# Supplementary material for: Serum Epiplakin Might Be a Potential Serodiagnostic Biomarker for Bladder Cancer
Source: MDPI journal article supplement (doi:10.3390/cancers13205150), 2021-10-14
Supplement: s1 [file s1]

**Table S1.** Univariate and multivariate Cox proportional hazards regression analyses using serum samples to predict NMIBC recurrence.

| Factor                                          | Univariate |           |      | Multivariate |           |      |
|-------------------------------------------------|------------|-----------|------|--------------|-----------|------|
|                                                 | HR         | 95%CI     | p    | HR           | 95%CI     | p    |
| Serum epiplakin $\geq 873$ (reference: $<873$ ) | 0.30       | 0.74-1.23 | 0.09 | 0.19         | 0.02-1.41 | 0.10 |
| Grade 3 (reference: G1/G2)                      | 1.16       | 0.36-3.70 | 0.80 | 3.10         | 0.35-27.2 | 0.31 |
| Urine cytology (reference: $<IIIb$ )            | 0.98       | 0.28-3.36 | 0.97 | 0.45         | 0.03-5.86 | 0.54 |
| pT1 (reference: $<pT1$ )                        | 0.66       | 0.20-2.21 | 0.50 | 0.49         | 0.31-7.60 | 0.61 |

HR: hazard ratio, CI: confidence interval.

**Table S2.** Clinical and pathological characteristics of patients with low and high epiplakin expressions according to immunohistochemistry.

| Characteristics        | Epiplakin         |                  | p-value |
|------------------------|-------------------|------------------|---------|
|                        | Low (n=80)        | High (n=47)      |         |
| Age (years) (%)        |                   |                  | 0.28    |
| $\leq 65$              | 38 (47.5)         | 27 (57.4)        |         |
| $>65$                  | 42 (52.5)         | 20 (42.6)        |         |
| Sex (%)                |                   |                  | 0.23    |
| Male                   | 61 (76.3)         | 40 (85.1)        |         |
| Female                 | 19 (23.8)         | 7 (14.9)         |         |
| T stage (%)            |                   |                  | 0.15    |
| pTa                    | 0                 | 2 (4.3)          |         |
| pTis                   | 1 (1.3)           | 3 (6.4)          |         |
| pT1                    | 14 (17.5)         | 8 (17.0)         |         |
| pT2                    | 20 (25.0)         | 12 (25.5)        |         |
| pT3                    | 32 (40.0)         | 12 (25.5)        |         |
| pT4                    | 13 (16.3)         | 10 (21.3)        |         |
| N stage (%)            |                   |                  | 0.56    |
| pN0                    | 54 (67.5)         | 34 (72.3)        |         |
| $\geq pN1$             | 21 (26.3)         | 12 (25.5)        |         |
| Unknown                | 5 (6.3)           | 1 (2.1)          |         |
| Grade (%)              |                   |                  | 0.18    |
| G1/2                   | 33 (41.3)         | 19 (40.4)        |         |
| G3                     | 47 (58.8)         | 26 (55.3)        |         |
| Unknown                | 0                 | 2 (4.3)          |         |
| LVI (%)                |                   |                  | 0.21    |
| Negative               | 24 (30.0)         | 16 (34.0)        |         |
| Positive               | 44 (55.0)         | 19 (40.4)        |         |
| Unknown                | 12 (15.0)         | 12 (25.5)        |         |
| CIS (%)                |                   |                  | 0.21    |
| Negative               | 66 (82.5)         | 42 (89.4)        |         |
| Positive               | 14 (17.5)         | 4 (8.5)          |         |
| Unknown                | 0                 | 1 (2.1)          |         |
| Recurrence (%)         |                   |                  | 0.92    |
| Yes                    | 35 (43.8)         | 21 (44.7)        |         |
| No                     | 45 (56.3)         | 26 (55.3)        |         |
| Cancer death (%)       |                   |                  | 0.88    |
| Yes                    | 30 (37.5)         | 17 (36.2)        |         |
| No                     | 50 (62.5)         | 30 (63.8)        |         |
| Follow-up, month (IQR) | 114.78 (2.67-731) | 70.8 (1.8-663.8) |         |

Unless otherwise stated, values are medians with ranges in parentheses or numbers of patients with percentages in parentheses.

LVI: lymphovascular invasion, CIS: carcinoma in situ, IQR: interquartile range

**Table S3.** Univariate and multivariate Cox proportional hazards regression analyses using immunohistochemical staining to predict recurrence.

| Factor                                 | Univariate |           |       | Multivariate |           |      |
|----------------------------------------|------------|-----------|-------|--------------|-----------|------|
|                                        | HR         | 95%CI     | p     | HR           | 95%CI     | p    |
| Epiplakin score: high (reference: low) | 0.75       | 0.44-1.27 | 0.28  | 0.72         | 0.39-1.33 | 0.29 |
| pT2-4 (reference: <pT2)                | 2.24       | 1.14-4.41 | 0.02  | 1.78         | 0.68-4.67 | 0.24 |
| pN positive (reference: pTN negative)  | 2.86       | 1.67-4.89 | <0.01 | 2.04         | 1.09-3.81 | 0.03 |
| Grade 3 (reference: G1/G2)             | 1.33       | 0.80-2.22 | 0.27  | 1.02         | 0.54-1.92 | 0.95 |
| LVI positive (reference: negative)     | 2.52       | 1.35-4.71 | <0.01 | 1.73         | 0.85-3.53 | 0.13 |
| CIS positive (reference: negative)     | 0.64       | 0.29-1.41 | 0.27  | 0.93         | 0.39-2.24 | 0.88 |

HR: hazard ratio, CI: confidence interval, LVI: lymphovascular invasion, CIS: carcinoma in situ.

**Table S4.** Univariate and multivariate Cox proportional hazards regression analyses using immunohistochemical staining to predict cancer-specific survival.

| Factor                                 | Univariate |           |       | Multivariate |           |      |
|----------------------------------------|------------|-----------|-------|--------------|-----------|------|
|                                        | HR         | 95%CI     | p     | HR           | 95%CI     | p    |
| Epiplakin score: high (reference: low) | 0.64       | 0.36-1.16 | 0.14  | 0.59         | 0.29-1.19 | 0.14 |
| pT2-4 (reference: <pT2)                | 2.01       | 0.98-4.13 | 0.06  | 1.62         | 0.56-4.68 | 0.37 |
| pN positive (reference: pN negative)   | 3.03       | 1.69-5.45 | <0.01 | 2.38         | 1.20-4.71 | 0.01 |
| Grade 3 (reference: G1/G2)             | 1.46       | 0.83-2.56 | 0.20  | 1.14         | 0.58-2.26 | 0.7  |
| LVI positive (reference: negative)     | 2.43       | 1.23-4.80 | 0.01  | 1.46         | 0.66-3.21 | 0.35 |
| CIS positive (reference: negative)     | 0.42       | 0.15-1.18 | 0.10  | 0.47         | 0.14-1.56 | 0.22 |

HR: hazard ratio, CI: confidence interval, LVI: lymphovascular invasion, CIS: carcinoma in situ.

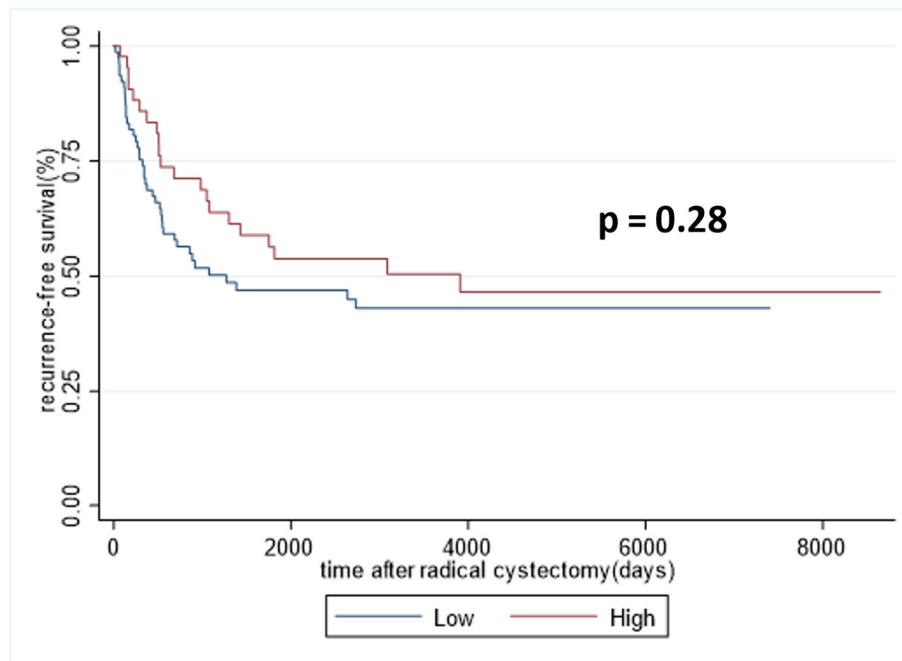

**Figure S1.** Survival analysis using a Kaplan-Meier curve to determine recurrence-free survival for high and low epiplakin expression.

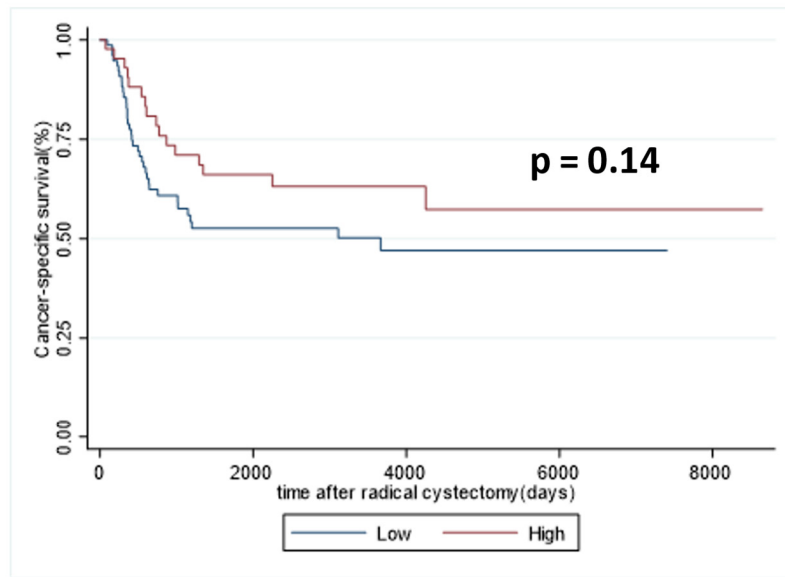

**Figure S2.** Survival analysis using a Kaplan-Meier curve to determine cancer-specific survival for high and low epiplakin expression.
